# Supplementary material for: Usability Assessments for Augmented Reality Head-Mounted Displays in Open Surgery and Interventional Procedures: A Systematic Review
Source: MDPI journal article supplement (doi:10.3390/mti7050049), 2023-05-09
Supplement: s1 [file s1]

| Section and Topic             | Item # | Checklist item                                                                                                                                                                                                                                                                                                                                                  | Location where item is reported                                                                                                                       |
|-------------------------------|--------|-----------------------------------------------------------------------------------------------------------------------------------------------------------------------------------------------------------------------------------------------------------------------------------------------------------------------------------------------------------------|-------------------------------------------------------------------------------------------------------------------------------------------------------|
| <b>TITLE</b>                  |        |                                                                                                                                                                                                                                                                                                                                                                 |                                                                                                                                                       |
| Title                         | 1      | Identify the report as a literature review.                                                                                                                                                                                                                                                                                                                     | Page 1, line 4                                                                                                                                        |
| <b>ABSTRACT</b>               |        |                                                                                                                                                                                                                                                                                                                                                                 |                                                                                                                                                       |
| Abstract                      | 2      | Provide a structured summary including, as applicable: background; objectives; data sources; study eligibility criteria, participants, and interventions; study appraisal and synthesis methods; results; limitations; conclusions and implications of key findings.<br><br>See the <a href="#">PRISMA 2020 for Abstracts checklist</a> for the complete list.  | Page 1, line 14-30 (formatted as requested by journal)                                                                                                |
| <b>INTRODUCTION</b>           |        |                                                                                                                                                                                                                                                                                                                                                                 |                                                                                                                                                       |
| Rationale                     | 3      | Describe the rationale for the review in the context of existing knowledge, i.e., what is already known about your topic.                                                                                                                                                                                                                                       | Page 1, line 35 to Page 3, line 116                                                                                                                   |
| Objectives                    | 4      | Provide an explicit statement of the objective(s) or question(s) the review addresses with reference to participants, interventions, comparisons, outcomes, and study design (PICOS).                                                                                                                                                                           | Page 3, line 117-125                                                                                                                                  |
| <b>METHODS</b>                |        |                                                                                                                                                                                                                                                                                                                                                                 |                                                                                                                                                       |
| Eligibility criteria          | 5      | Specify the inclusion and exclusion criteria for the review and how studies were grouped for the syntheses with study characteristics (e.g., PICOS, length of follow-up) and report characteristics (e.g., years considered, language, publication status) used as criteria for eligibility, giving rationale.                                                  | Page 3, line 130-145                                                                                                                                  |
| Information sources           | 6      | Specify all databases, registers, websites, organisations, reference lists and other sources searched or consulted to identify studies. Specify the date when each source was last searched or consulted.                                                                                                                                                       | Page 3, line 132 and 137-138                                                                                                                          |
| Search strategy               | 7      | Present the full search strategies for all databases, registers and websites, including any filters and limits used.                                                                                                                                                                                                                                            | Page 3, line 135-145                                                                                                                                  |
| Selection process             | 8      | State the process for selecting studies (i.e., screening, eligibility).<br><br>Specify the methods used to decide whether a study met the inclusion criteria of the review, including how many reviewers screened each record and each report retrieved, whether they worked independently, and if applicable, details of automation tools used in the process. | Page 3, line 146-152                                                                                                                                  |
| Study risk of bias assessment | 11     | Specify the methods used to assess risk of bias in the included studies, including details of the tool(s) used, how many reviewers assessed each study and whether they worked independently, and if applicable, details of automation tools used in the process.                                                                                               | Page 3, line 153-167                                                                                                                                  |
| <b>RESULTS</b>                |        |                                                                                                                                                                                                                                                                                                                                                                 |                                                                                                                                                       |
| Study selection               | 16a    | Describe the results of the search and selection process, from the number of records identified in the search to the number of studies included in the review, ideally using a flow diagram.                                                                                                                                                                    | Page 4, line 170                                                                                                                                      |
|                               | 16b    | Cite studies that might appear to meet the inclusion criteria, but which were excluded, and explain why they were excluded.                                                                                                                                                                                                                                     | N/A                                                                                                                                                   |
| Study characteristics         | 17     | Cite each included study and present its characteristics (e.g., study size, PICOS, follow-up period).                                                                                                                                                                                                                                                           | Supplementary Table S1                                                                                                                                |
| Risk of bias in studies       | 18     | Present assessments of risk of bias for each included study.                                                                                                                                                                                                                                                                                                    | Section 3.3 User Demographics                                                                                                                         |
| Results of individual studies | 19     | For all outcomes, present, for each study: (a) summary statistics for each group (where appropriate) and (b) an effect estimate and its precision (e.g. confidence/credible interval), ideally using structured tables or plots.                                                                                                                                | (a) 3.1 device types, 3.2 surgical applications, 3.3 user demographics, 3.4 usability assessments<br><br>(b) N/A, effect estimates were not developed |
| <b>DISCUSSION</b>             |        |                                                                                                                                                                                                                                                                                                                                                                 |                                                                                                                                                       |
| Discussion                    | 23a    | Provide a general interpretation of the results in the context of other evidence.                                                                                                                                                                                                                                                                               | Section 4.1 Usability assessments for                                                                                                                 |

| Section and Topic                               | Item # | Checklist item                                                                                                                                                                                                                             | Location where item is reported                                                                                             |
|-------------------------------------------------|--------|--------------------------------------------------------------------------------------------------------------------------------------------------------------------------------------------------------------------------------------------|-----------------------------------------------------------------------------------------------------------------------------|
|                                                 |        |                                                                                                                                                                                                                                            | XR+ devices<br>Section 4.2 Additional assessments and reporting related to usability                                        |
|                                                 | 23b    | Discuss any limitations of the evidence included in the review.                                                                                                                                                                            | Section 4.3 Limitations                                                                                                     |
|                                                 | 23c    | Discuss any limitations of the review processes used.                                                                                                                                                                                      | Section 4.3 Limitations                                                                                                     |
|                                                 | 23d    | Discuss implications of the results for practice, policy, and future research.                                                                                                                                                             | Section 5 Conclusions                                                                                                       |
| <b>OTHER INFORMATION</b>                        |        |                                                                                                                                                                                                                                            |                                                                                                                             |
| Registration and protocol                       | 24a    | Provide registration information for the review, including register name and registration number, or state that the review was not registered.                                                                                             | Line 465-466                                                                                                                |
|                                                 | 24b    | Indicate where the review protocol can be accessed, or state that a protocol was not prepared.                                                                                                                                             | Line 465-466                                                                                                                |
|                                                 | 24c    | Describe and explain any amendments to information provided at registration or in the protocol.                                                                                                                                            | N/A                                                                                                                         |
| Support                                         | 25     | Describe sources of financial or non-financial support for the review, and the role of the funders or sponsors in the review.                                                                                                              | Line 502-506                                                                                                                |
| Competing interests                             | 26     | Declare any competing interests of review authors.                                                                                                                                                                                         | Line 510-512                                                                                                                |
| Availability of data, code, and other materials | 27     | Report which of the following are publicly available and where they can be found: template data collection forms; data extracted from included studies; data used for all analyses; analytic code; any other materials used in the review. | As a systematic review, all data are available in supplementary table 1 and the tables and figures included in the article. |
