# Supplementary material for: Usability Assessments for Augmented Reality Head-Mounted Displays in Open Surgery and Interventional Procedures: A Systematic Review
Source: MDPI journal article supplement (doi:10.3390/mti7050049), 2023-05-09
Supplement: s1 [file s1]

# SUPPLEMENTAL DIGITAL CONTENT

Supplemental Table S1  
SUMMARY OF XR+ DEVICES, USE CASES, AND ASSESSMENTS FROM ANALYZED ARTICLES

| Reference                          | Specialty   | Vis. Type | Display(s)      | Task   | # of Subs (F)     | Procedure Space     | Assessment                                                                                                                     |
|------------------------------------|-------------|-----------|-----------------|--------|-------------------|---------------------|--------------------------------------------------------------------------------------------------------------------------------|
| (Acker et al. 2018)                | Neuro       | Stereo    | DT+glasses      | Pl     | 26 (NR)           | N/A                 | Interrater agreement of feature detection; Detection rates; Relationship of detection rate, experience, and visualization type |
| (Alexander et al. 2020)            | Ortho       | AR        | DT              | Pr     | 8 (NR)            | Phantom             | Task error, Task time, Fluoroscopy time, System Usability Scale (SUS), Surg-TLX                                                |
| (Al-Saud et al. 2017)              | O/M         | VR        | DT+glasses      | Pr     | 16 (13)           | Virtual             | Error scores, Task completion percentage, Refresh rate                                                                         |
| (Allgaier et al. 2022)             | General     | VR        | HMD             | Pl     | 22 (8F, 3NB)      | N/A                 | NASA TLX, SSQ, adapted SUS, Tool preference, Task time, Task error, Task attempts, General feedback                            |
| (Alsofy et al. 2021)               | Ortho       | VR        | HMD             | Pl     | 10(NR)            | N/A                 | Potential influence of VR on past cases                                                                                        |
| (Amini and Kersten-Oertel 2019)    | Surg/IR Onc | AR        | HMD             | Pl     | 13 (5)            | N/A                 | Task time, SUS                                                                                                                 |
| (Andersen et al. 2017)             | General     | AR        | DT              | Pr     | 20 (10)           | Phantom             | UX, Attention shift, Task error, Task time                                                                                     |
| (Andersen et al. 2019)             | Trauma      | AR        | DT, HHD         | Pr     | 20 (NR)           | Phantom             | Idle time, Recall error of procedural steps, Task performance rating                                                           |
| (Andersen et al. 2021)             | ENT         | VR        | DT+glasses      | Pl     | 9(2)              | N/A                 | UX                                                                                                                             |
| (Arpaia et al. 2022)               | General     | AR        | HMD             | Pr     | NR                | Phantom, Live human | Display accuracy, System latency, adapted SUS                                                                                  |
| (Asgar-Deen et al. 2020)           | Surg/IR Onc | AR        | Mirror          | Pr     | 10(NR)            | Phantom             | Task error, Task time, UX                                                                                                      |
| (Azar et al. 2004)                 | Neuro       | VR        | HMD, DT+glasses | Pr     | 28 (NR)           | Phantom             | Task error, Task time, UX                                                                                                      |
| (Ballocca et al. 2018)             | Cardio      | VR        | DT+glasses      | Pl     | 1 (NR)            | N/A                 | Agreement of measurements, Task time, Interobserver variability                                                                |
| (Bartella et al. 2019)             | O/M         | VR        | HMD             | Pl     | 4 (NR)            | N/A                 | UX                                                                                                                             |
| (Bartlett et al. 2020)             | Endovasc    | AR        | HMD             | Pr     | 20(NR)            | Non-medical         | Head rotation, Hand activity, Body posture, Task time, Time spent viewing displays                                             |
| (Benmahdjoub et al.)               | Neuro, O/M  | AR        | HMD, HUD        | Pr     | 10 (4)            | Phantom             | Tool location error, Calibration time and error, Overlay registration error, Task error                                        |
| (Bichlmeier et al. 2009)           | Ortho       | AR        | HMD, DT         | Pr     | 5 (NR)<br>12 (NR) | Phantom             | UX, Task error, Frame rate                                                                                                     |
| (Block, Yablok, and McDonald 1995) | Anesthes    | AR        | HUD             | Pr     | 11 (NR)           | Live human          | UX                                                                                                                             |
| (Boedecker et al. 2021)            | General     | VR        | HMD             | Pl     | 5(NR)             | N/A                 | SUS                                                                                                                            |
| (Bong, Kim, and Park 2017)         | Ortho       | AR        | DT              | Pl, Pr | 5 (1)             | Phantom             | System error, Task error                                                                                                       |
| (Bruckheimer et al. 2016)          | Cardio      | AR        | Hologram        | Pl     | 4 (NR)            | N/A                 | Image quality rating, UX, Identification of landmarks                                                                          |
| (Brun et al. 2018)                 | Cardio      | AR        | HMD             | Pl     | 36 (12)           | N/A                 | Identification of landmarks, Diagnosis, Suggested surgical plan, UX                                                            |
| (Cardin et al. 2007)               | Surg/IR Onc | VR        | DT+glasses      | Pr     | 28 (14)           | Virtual             | Task error, Task time                                                                                                          |
| (Cartucho et al. 2020)             | Neuro       | AR        | HMD             | Pl     | 9 (NR)            | N/A                 | UX                                                                                                                             |
| (Cattari et al. 2021)              | Surg/IR Onc | AR        | HMD             | Pr     | 10 (NR)           | Phantom             | Overlay registration error, Task success rate, Task error, Visual discomfort, Perceived overlay error                          |
| (Chen et al. 2014)                 | Ortho       | AR        | DT              | Pr     | 8 (NR)            | Phantom             | Time for re-calibration, Number of x-ray image acquisitions needed                                                             |
| (Coelho et al. 2020)               | Neuro, O/M  | AR        | HHD             | Pl     | 38 (NR)           | N/A                 | UX                                                                                                                             |
| (Condino et al. 2021)              | Neuro       | AR        | HMD             | Pr     | 11(~6)            | Phantom, Live human | Registration error, Navigation accuracy, Qualitative registration assessment, Template adjustments                             |
| (Cutolo, Parchi, and Ferrari 2014) | Ortho       | AR        | HMD             | Pr     | 10 (NR)           | Phantom             | Registration error, Refresh rate                                                                                               |
| (Cutolo et al. 2016)               | Ortho       | AR        | HMD             | Pl, Pr | 1 (NR)            | Phantom             | Task error                                                                                                                     |
| (Cutolo et al. 2017)               | Neuro       | AR        | HMD             | Pl, Pr | 12 (NR)           | Phantom             | User rating, Choice of visualization modality, Task success, Frame rate                                                        |
| (Davrieux et al. 2020)             | Surg/IR Onc | AR        | HMD             | Pr     | 23 (NR)           | Phantom             | Task time, Task attempts, Task error                                                                                           |

|                                    |                         |    |               |        |         |                                    |                                                                                                                                      |
|------------------------------------|-------------------------|----|---------------|--------|---------|------------------------------------|--------------------------------------------------------------------------------------------------------------------------------------|
| (Deib et al. 2018)                 | Ortho                   | AR | HMD           | Pr     | 1 (NR)  | Phantom                            | Visibility of landmarks and materials, Fluoroscopy time, Task time, UX                                                               |
| (Desender et al. 2013)             | Endovasc                | VR | DT            | Pl     | 24 (NR) | N/A                                | User rating, Change of plan due to rehearsal, Task time, Fluoroscopy time, Dexterity/Efficiency metrics, Number of angiographs taken |
| (El-Hariri et al. 2018)            | Ortho                   | AR | HMD           | Pr     | NR      | Phantom                            | Registration error                                                                                                                   |
| (El-Khameesy and El-Wishy 2012)    | Surg/IR Onc             | VR | various       | Pl     | 20 (NR) | N/A                                | UX, Planning time                                                                                                                    |
| (Enislidis et al. 1997)            | O/M                     | AR | HUD           | Pl, Pr | NR      | Phantom, Live human                | Feasibility                                                                                                                          |
| (Erat et al. 2013)                 | Ortho                   | AR | DT            | Pr     | 3 (NR)  | Animal cadaver                     | User rating                                                                                                                          |
| (Fick et al. 2021)                 | Neuro                   | AR | HMD           | Pr     | NR      | Phantom                            | Registration error                                                                                                                   |
| (Fischer et al. 2016)              | Ortho                   | AR | DT            | Pr     | 7 (NR)  | Phantom                            | Task time, Number of x-ray image acquisitions, Task error, Surg-TLX                                                                  |
| (Fotouhi et al. 2018)              | Ortho                   | AR | HMD           | Pr     | 4 (NR)  | Phantom                            | Calibration error, Task error                                                                                                        |
| (Freschi et al. 2009)              | Surg/IR Onc             | VR | DT            | Pl, Pr | 3 (NR)  | Phantom                            | Task error, Task success rate                                                                                                        |
| (Furtado et al. 2010)              | Endovasc                | VR | DT            | Pr     | 17 (NR) | Phantom                            | Task time, Task error, UX                                                                                                            |
| (Galati et al. 2020)               | Surg/IR Onc             | AR | HMD           | Pr     | 6 (NR)  | Live human                         | UX                                                                                                                                   |
| (Gao et al. 2021)                  | Surg/IR Onc             | AR | Proj          | Pr     | 10(NR)  | Phantom, Animal cadaver            | Projection error, Task success rate, UX                                                                                              |
| (Gavaghan et al. 2012)             | Ortho, O/M, Surg/IR Onc | AR | Proj          | Pl, Pr | 12 (NR) | Live human, Human cadaver, Phantom | UX, Frame rate                                                                                                                       |
| (Gerard et al. 2018)               | Neuro                   | AR | DT            | Pr     | 2 (NR)  | Live human                         | UX, Registration error                                                                                                               |
| (Glas et al. 2021)                 | O/M                     | AR | HMD           | Pr     | 12 (0)  | Phantom                            | Task error, Task speed, UX                                                                                                           |
| (Gökyar, Bahadır, and Çokluk 2020) | Neuro                   | AR | Proj          | Pr     | NR      | Animal cadaver                     | Task success rate                                                                                                                    |
| (Gsaxner et al. 2021)              | ENT                     | AR | HMD           | Pr     | 11 (NR) | Phantom                            | SUS, UX, Training time, Task time                                                                                                    |
| (Gu et al. 2022)                   | Ortho                   | AR | HMD           | Pr     | 12 (NR) | Phantom                            | Detection of registration error                                                                                                      |
| (Guiraudon et al. 2010)            | Cardio                  | VR | DT            | Pr     | NR      | Live animal, Animal cadaver        | Feasibility, Task error                                                                                                              |
| (Guo, Cai, and Gao 2018)           | Endovasc                | VR | DT            | Pr     | NR      | Virtual                            | Refresh rate, UX                                                                                                                     |
| (Hans et al. 1999)                 | ENT                     | VR | DT            | Pl     | 17 (NR) | N/A                                | Image quality rating, Interobserver agreement, User visualization preferences                                                        |
| (Hansen et al. 2010)               | General                 | AR | DT            | Pr     | 6 (NR)  | Live human (video), Animal cadaver | UX, Depth perception                                                                                                                 |
| (Harake et al. 2020)               | Cardio                  | VR | DT+glasses    | Pl     | 22(NR)  | N/A                                | UX, User preference (Engagement with images based on manipulation and viewing time)                                                  |
| (Harel et al. 2022)                | Ortho                   | AR | HMD           | Pr     | 6 (NR)  | Live human                         | Task accuracy, UEQ, UX                                                                                                               |
| (Heining et al. 2006)              | Ortho                   | AR | DT            | Pr     | NR      | Human cadaver, Phantom             | Feasibility, Fluoroscopy time                                                                                                        |
| (Heinrich et al. 2020)             | Surg/IR Onc             | AR | HMD, DT, Proj | Pr     | 21(13)  | Phantom                            | Mental workload (Reaction time for secondary task), Task time, Task error, Task success, UX                                          |
| (Hendel et al. 2021)               | Derm/Plastic            | VR | HHD           | Pl     | 3(NR)   | N/A                                | Accuracy of generated models; Inter- and intra-investigator reliability of generated models                                          |
| (Hombeck et al. 2022)              | General                 | VR | DT, HMD       | Pl     | 56 (21) | N/A                                | User confidence, Task error, Display preferences, Task time                                                                          |
| (Huang et al. 2019)                | Surg/IR Onc             | AR | HMD           | Pr     | NR      | Phantom                            | Feasibility of shared visualization; Error in location of shared virtual content across HMD users; Task error                        |
| (Huettl et al. 2021)               | Surg/IR Onc             | VR | DT HMD        | Pl     | 30 (15) | N/A                                | Task success. Task time, Titmus test for stereoacuity, Mental Rotation Test, SUS, SSQ, UX                                            |
| (Incekara et al. 2018)             | Neuro                   | AR | HMD           | Pl, Pr | 2 (NR)  | Live human                         | Planning time, Registration error                                                                                                    |
| (Jeon, Choi, and Kim 2014)         | Anesthes                | AR | Proj          | Pr     | 20 (NR) | Phantom                            | Task time, Task efficiency                                                                                                           |

|                                          |                     |        |              |        |                 |                         |                                                                                                                                  |
|------------------------------------------|---------------------|--------|--------------|--------|-----------------|-------------------------|----------------------------------------------------------------------------------------------------------------------------------|
| (Jinnin et al. 2011)                     | Derm/ Plastic       | Stereo | Image        | Pl     | 26 (8)          | N/A                     | UX                                                                                                                               |
| (Juhnke et al. 2013)                     | Ortho               | VR     | DT           | Pl     | 17 (15)         | N/A                     | Task success rate, Task accuracy, Task time, User preferences                                                                    |
| (Katic et al. 2015)                      | O/M                 | AR     | HMD          | Pr     | NR              | Animal cadaver          | Calibration time, Calibration error, Task error, UX                                                                              |
| (Kendoff et al. 2009)                    | Ortho               | AR     | DT           | Pr     | 9 (NR)          | Live human              | Setup time, UX, Change of intraoperative decisions, Image quality rating, System failure rate, Fluoroscopy time                  |
| (Kersten-Oertel, Chen, and Collins 2014) | Neuro               | VR     | DT+glasses   | Pl     | 35 (10)         | N/A                     | Depth perception, User rating, Refresh rate                                                                                      |
| (Kim et al. 2019)                        | Cardio              | AR     | HHD          | Pr     | NR              | Phantom                 | Task error                                                                                                                       |
| (Kim et al. 2020)                        | Cardio              | VR     | Proj, HMD    | Pl     | 22(19)          | N/A                     | User's previous medical and VR experience, Discussion time by case and display type, Accuracy of diagnosis, User preferences, UX |
| (Kim et al. 2022)                        | Cardio              | VR     | HMD          | Pl     | 5 (NR)          | N/A                     | Task time, Outcomes                                                                                                              |
| (Koike et al. 2021)                      | Neuro               | AR     | DT           | Pr     | NR              | Live human              | Registration error, Task time, Task efficiency                                                                                   |
| (Kozlowski, Urheim, and Samset 2017)     | Cardio              | Stereo | DT           | Pr     | 5 (NR)          | Phantom                 | Frame rate, System lag, Task time, UX                                                                                            |
| (Kubben and Sinlae 2019)                 | Neuro               | AR     | HMD          | Pr     | 2(NR)           | Operating room          | UX, Visualization error, System performance (Recognition of hand gestures)                                                       |
| (Kumar et al. 2020)                      | Cardio              | AR     | HMD          | Pl     | 62(7)           | N/A                     | UX, Task success                                                                                                                 |
| (Léger et al. 2018)                      | Neuro               | AR     | HHD          | Pr     | 17(9)           | Phantom                 | Registration error, UX                                                                                                           |
| (Léger et al. 2020)                      | Neuro               | AR     | HHD          | Pr     | 10 (3)          | Phantom                 | Task error, Task time, Registration error, Latency, NASA-TLX                                                                     |
| (Lo et al. 2009)                         | Cardio              | VR     | DT           | Pr     | 8 (NR)          | Phantom                 | Task error, Task time, NASA TLX                                                                                                  |
| (Londei et al. 2015)                     | Ortho               | AR     | DT           | Pr     | 4 (NR)          | Phantom                 | Task error, Task success rate, Number of x-ray acquisitions, Task time                                                           |
| (Ma et al. 2017)                         | Ortho               | AR     | Mirror       | Pl, Pr | NR              | Animal cadaver, Phantom | Calibration error, Registration error, Task error                                                                                |
| (Marschollek et al. 2006)                | Ortho               | VR     | DT           | Pl     | 3 (NR)          | N/A                     | UX                                                                                                                               |
| (Molina et al. 2019)                     | Ortho               | AR     | HMD          | Pr     | 4 (NR)          | Human cadaver           | Task error, UX                                                                                                                   |
| (Moosburner et al. 2018)                 | General             | AR     | HMD          | Pr     | 17 (NR)         | Virtual                 | SUS                                                                                                                              |
| (Moreta-Martinez et al. 2021)            | Surg/IR Onc         | AR     | HHD          | Pl, Pr | 10(NR)<br>2(NR) | Phantom                 | Registration error, UX                                                                                                           |
| (Napa, Moore, and Bardyn 2019)           | Cardio              | VR     | HMD          | Pl     | 8 (3)           | N/A                     | SUS, NASA TLX, UX                                                                                                                |
| (Nguyen et al. 2020)                     | Ortho               | AR     | HMD          | Pr     | 9(NR)           | Live human              | Display opacity, Color preferences, UX                                                                                           |
| (Novotny et al. 2020)                    | Ob                  | VR     | Proj+glasses | Pl     | 8 (NR)          | N/A                     | Task error, Task time, Image resolution                                                                                          |
| (Ogawa et al. 2018)                      | Ortho               | AR     | HHD          | Pr     | 2 (NR)          | Live human              | Task error                                                                                                                       |
| (Pahuta et al. 2012)                     | Ortho               | VR     | DT           | Pl     | 48 (NR)         | N/A                     | Mental Rotations Test, Task error                                                                                                |
| (Pandey et al. 2021)                     | Ortho               | Stereo | DT           | Pr     | 21 (NR)         | Virtual                 | Task time, Task error, UX,                                                                                                       |
| (Pellegrino et al. 2019)                 | O/M                 | AR     | HMD          | Pr     | 1 (NR)          | Live human              | Task error, Task success                                                                                                         |
| (Pepe et al. 2019)                       | O/M                 | AR     | HMD          | Pr     | 6 (NR)          | Phantom                 | Task error, ISO-9241/110-based questionnaire                                                                                     |
| (Perkins et al. 2017)                    | Surg/IR Onc         | AR     | HMD          | Pl     | 8 (NR)          | N/A                     | Visualization error                                                                                                              |
| (Pfeiffer et al. 2018)                   | Surg/IR Onc, Cardio | VR     | HMD          | Pl     | 77 (NR)         | N/A                     | UX, Feasibility                                                                                                                  |
| (Ponce et al. 2016)                      | Neuro, Ortho        | AR     | HHD          | Pr     | 31 (NR)         | Live human              | UX                                                                                                                               |
| (Pushparajah et al. 2021)                | Cardio              | VR     | HMD          | Pl     | 5(NR)           | N/A                     | User confidence in decision-making, Revisions to decision-making                                                                 |
| (Qian et al. 2017)                       | Ortho               | AR     | HMD          | Pr     | 23(4)           | Phantom                 | Text readability, Contrast perception, NASA-TLX, Frame rate, System lag                                                          |
| (Qian et al. 2019)                       | General             | AR     | HMD          | Pr     | 20 (5)          | Phantom                 | Task time, Task variability, UX                                                                                                  |
| (Reitinger et al. 2006)                  | Surg/IR Onc         | VR     | DT+glasses   | Pl     | 19 (NR)         | N/A                     | Task time, Task success, Task error, Quality of task performance, UX                                                             |
| (Rojas-Munoz et al. 2019)                | General             | AR     | HMD, DT      | Pr     | 20 (6)          | Phantom                 | Task error, Task time, Focus shifts, UX                                                                                          |
| (Rojas-Muñoz et al. 2020)                | Trauma              | AR     | HMD          | Pr     | 20 (3)          | Phantom                 | Task time, Emergency Cricothyroidotomy Performance scores, Global Rating Scale, Evaluator's Overall Rating, Critical Criteria    |

|                                 |              |    |               |        |                 |                          |                                                                                                                                                                                                        |
|---------------------------------|--------------|----|---------------|--------|-----------------|--------------------------|--------------------------------------------------------------------------------------------------------------------------------------------------------------------------------------------------------|
| (Rojas-Munoz et al. 2020)a      | Trauma       | AR | HMD           | Pr     | 20 (6)          | Human cadaver            | Number of task errors, Task time, Global Rating Score, Evaluator Overall Rating, Confidence in independent task recall/performance                                                                     |
| (Rolls et al. 2013)             | Neuro        | AR | DT            | Pr     | 21 (NR)         | Phantom                  | Task and tool efficiency, Task time, Fluoroscopy time, Task error, Task performance rating                                                                                                             |
| (Sadri et al. 2019)             | Endovasc     | AR | HMD           | Pr     | >40 (NR)        | Virtual, Phantom         | Task error, Task time, NASA-TLX, Mental rotation test, Stereo Optical Co. Inc. Stereo Fly Test, Pseudo-Isochromatic Plate Color vision test, UX                                                        |
| (Sampogna et al. 2017)          | General      | VR | HMD           | Pl, Pr | 20 (NR)         | Phantom                  | UX                                                                                                                                                                                                     |
| (Saylany et al. 2020)           | Ortho        | AR | HUD           | Pr     | 1 (NR)          | Live human               | Task success, UX                                                                                                                                                                                       |
| (Scherl et al. 2020)            | ENT          | AR | HMD           | Pr     | NR              | Phantom, Live human      | Registration error, UX, Effect of training on registration                                                                                                                                             |
| (Scherl et al. 2021)            | ENT          | AR | HMD           | Pr     | NR              | Live human               | Registration error, UX, Preparation time, Task time, Complications                                                                                                                                     |
| (Seitel et al. 2009)            | Cardio       | VR | DT            | Pl     | 3 (NR)          | N/A                      | Registration error, Visualization error, Intra- and inter-operator variability of task performance, Task time                                                                                          |
| (Si et al. 2018)                | Surg/IR Onc  | AR | HMD           | Pr     | 10 (NR)         | Phantom                  | Task error, Planning and setup time, Task time, UX                                                                                                                                                     |
| (Southworth et al. 2020)        | Cardio       | AR | HMD           | Pr     | 10(NR)          | Live human (observation) | Geometric distortion (bench and human testing), Projection error, Similarity of 2D and 3D images, Object positioning accuracy, Color accuracy, Contrast accuracy, Latency, Frame rate, Battery runtime |
| (Stadie and Kockro 2013)        | Neuro        | VR | DT+glasses    | Pl     | 20 (NR)         | N/A                      | UX, Refresh rate                                                                                                                                                                                       |
| (Stamm et al. 2002)             | O/M          | VR | DT            | Pl     | 1 (NR)          | N/A                      | Feasibility                                                                                                                                                                                            |
| (Suenaga et al. 2013)           | O/M          | AR | Mirror        | Pr     | NR              | Live human               | Task error                                                                                                                                                                                             |
| (Suenaga et al. 2015)           | O/M          | AR | Proj          | Pr     | NR              | Live human               | Registration error, Frame rate                                                                                                                                                                         |
| (Tabrizi and Mahvash 2015)      | Neuro        | AR | Proj          | Pr     | NR              | Live human, Phantom      | Registration success, Registration time, Visualization error                                                                                                                                           |
| (Tai et al. 2020)               | Neuro        | VR | HMD           | Pl     | 1               | N/A                      | Feasibility, Differences in surgical approach                                                                                                                                                          |
| (Testi et al. 2006)             | Ortho        | VR | DT+glasses    | Pl     | 5 (NR)          | N/A                      | System error, Task time, Task error                                                                                                                                                                    |
| (Thabit et al. 2022)            | Neuro        | AR | HMD           | Pl     | 12 (NR)         | Phantom                  | Task error, UX                                                                                                                                                                                         |
| (Tian et al. 2015)              | Surg/IR Onc  | VR | DT            | Pl, Pr | 1 surgical team | Live human               | Visualization error                                                                                                                                                                                    |
| (Timonen et al. 2020)           | ENT          | VR | HMD           | Pl     | 5(NR)           | N/A                      | Measurement errors; Bland-Altman agreement of measurement, Face validity, Content validity, UX                                                                                                         |
| (Traub et al. 2006)             | Ortho        | AR | HMD           | Pr     | 3 (NR)          | Human cadaver            | Feasibility                                                                                                                                                                                            |
| (Tsukada et al. 2019)           | Ortho        | AR | HHD           | Pr     | 1 (NR)          | Phantom                  | Visualization error                                                                                                                                                                                    |
| (Ungar et al. 2019)             | ENT          | VR | DT            | Pl     | 1 (NR)          | N/A                      | Feasibility                                                                                                                                                                                            |
| (Urakov 2020)                   | Ortho        | AR | HMD           | Pr     | 1(NR)           | Phantom                  | Task time, Task completion; Task error, Complications                                                                                                                                                  |
| (Vaghela, Lee, and Akhtar 2018) | Ortho        | VR | DT            | Pr     | 25 (NR)         | Phantom                  | Construct validity                                                                                                                                                                                     |
| (van den Berg et al. 2016)      | Derm/Plastic | VR | DT            | Pr     | NR              | Live human               | Visualization error                                                                                                                                                                                    |
| (Vertemati et al. 2019)         | General      | VR | HMD           | Pl     | 33 (NR)         | N/A                      | UX                                                                                                                                                                                                     |
| (Viehofer et al. 2020)          | Ortho        | AR | HMD           | Pr     | 2(NR)           | Phantom                  | Task error, Task performance by level of experience                                                                                                                                                    |
| (Vos et al. 2015)               | Surg/IR Onc  | VR | Proj+ glasses | Pl     | 2 (NR)          | N/A                      | Interobserver reliability of surgical evaluation, Patient outcome assessment, Surgeon outcome assessment                                                                                               |
| (Wacker et al. 2005)            | Surg/IR Onc  | AR | HMD           | Pr     | NR              | Live animal, Phantom     | Task error, Task time, UX                                                                                                                                                                              |
| (Wang et al. 2012)              | Endovasc     | AR | DT            | Pl, Pr | 16 (NR)         | Phantom                  | UX                                                                                                                                                                                                     |
| (Wang, Wang, et al. 2016)       | Ortho        | AR | HMD           | Pr     | 1 (NR)          | Human cadaver            | Task error                                                                                                                                                                                             |
| (Wang, Habert, et al. 2016)     | Ortho        | AR | DT            | Pr     | 24 (NR)         | Virtual                  | Perception of relative depth, Visualization accuracy, Preferred visualization method, UX                                                                                                               |

|                                                 |             |    |     |        |                                    |                     |                                                                                                                                                                                                                                                                                                                                                                                                                                   |
|-------------------------------------------------|-------------|----|-----|--------|------------------------------------|---------------------|-----------------------------------------------------------------------------------------------------------------------------------------------------------------------------------------------------------------------------------------------------------------------------------------------------------------------------------------------------------------------------------------------------------------------------------|
| (Wellens et al. 2019)                           | Surg/IR Onc | VR | HMD | Pl     | 7 (NR)                             | N/A                 | UX, Comparison of virtual and 3D-printed model                                                                                                                                                                                                                                                                                                                                                                                    |
| (Werkgartner et al. 2004)                       | Surg/IR Onc | AR | HMD | Pl     | NR                                 | N/A                 | Feasibility                                                                                                                                                                                                                                                                                                                                                                                                                       |
| (Willaert et al. 2010)                          | Neuro       | VR | DT  | Pl, Pr | 7 (NR)                             | Virtual, Live human | Face validity, UX, Task time, Fluoroscopy time, Tool and material choices                                                                                                                                                                                                                                                                                                                                                         |
| (Willaert, Aggarwal, Daruwalla, et al. 2012)    | Neuro       | VR | DT  | Pl     | 20 (NR)                            | Virtual             | Fluoroscopy time, Procedure time, Dexterity/Efficiency metrics, Objective Structured Assessment of Technical Skills (OSATS)-derived generic endovascular (Global Rating Scale, GRS) and procedure-specific rating scales (PSRS) for carotid artery stenting procedures (CAS)                                                                                                                                                      |
| (Willaert, Aggarwal, Van Herzeele, et al. 2012) | Neuro       | VR | DT  | Pl, Pr | Pl: 3 (NR), Pr =<15 surgical teams | Virtual, Live human | Tool choice, Dexterity/Efficiency metrics, Procedure time, Qualitative task performance, Objective Structured Assessment of Technical Skills (OSATS)-derived generic endovascular (Global Rating Scale, GRS) and procedure-specific rating scales (PSRS) for carotid artery stenting procedures (CAS), Non-technical skills (NOTECHS) for surgeons, Mayo High Performance Teamwork Scale (MHPTS), Face validity, Content validity |
| (Wu et al. 2022)                                | General     | AR | DT  | Pr     | NR                                 | Live human          | Task time, Blood loss, Surgical outcomes                                                                                                                                                                                                                                                                                                                                                                                          |
| (Yanni et al. 2021)                             | Ortho       | AR | HMD | Pr     | 11 (NR)                            | Phantom             | Task performance rating, UX                                                                                                                                                                                                                                                                                                                                                                                                       |
| (Ye et al. 2021)                                | Cardio      | AR | HMD | Pl     | Team                               | N/A                 | Task time, 3D image reconstruction time, Accuracy of diagnosis, Similarity of plan to procedure                                                                                                                                                                                                                                                                                                                                   |
| (Yoon et al. 2017)                              | Ortho       | AR | HUD | Pr     | 2(0)                               | Live human          | Task time, UX                                                                                                                                                                                                                                                                                                                                                                                                                     |
| (Zawy Alsofy, Sakellaropoulou, and Stroop 2020) | Neuro       | VR | DT  | Pl, Pr | 9 (NR)                             | Virtual, Live human | Task success, Post-op patient symptoms, Potential influence of VR on past cases                                                                                                                                                                                                                                                                                                                                                   |
| (Zuo et al. 2020)                               | Endovasc    | AR | HMD | Pr     | 15 (9)                             | Phantom in OR       | Task error, Frame rate, Muscle fatigue, System performance during user movement, NASA TLX, Visualization quality, UX                                                                                                                                                                                                                                                                                                              |

Ortho = Orthopedic or Spinal Surgery; Neuro = Neurosurgery or Neuro-interventional; Surg/IR Onc = Surgical or Interventional Oncology; General = General Surgery; Cardio = Interventional Cardiology or Cardiac Surgery; O/M = Oral and Maxillofacial Surgery; Endovasc = Endovascular Surgery; Derm/Plastic = Dermatology or Plastic Surgery; Anesth = Anesthesiology; ENT = Otolaryngology; Ob = Obstetrics; Trauma = Emergency Medicine or Trauma Surgery; VR = Virtual Reality; Stereo = Stereoscopic 3D Visualization; HMD = Head-Mounted Display; HHD = Handheld Display; HUD = Head-Up Display; Glasses = Glasses for stereoscopic 3D-visualization; DT = Desktop Display or Monitor; Pl = Planning, Pr = Procedure; UX = User Experience, subjective (e.g. survey, questionnaire, interview or general feedback); NR = Not reported; N/A = Not Applicable
